# Supplementary material for: Unfavourable beliefs about oral health and safety of dental care during pregnancy: a systematic review
Source: Springer Nature journal article supplement (doi:10.1186/s12903-023-03439-4), 2023-10-15
Supplement: MOESM2 [file 26182888]

**Table S2. Search Strategy.**

|                    | Database                                                                                                                                                                                                                                                                                                                                                                                                                                                                                                                                                                                                                                                                                                                                                                                                                                                                                                                                                                                                                                                                                                                      |                                                                                                                                                                                                    |                                                                                                |                                                                                                                                                                |
|--------------------|-------------------------------------------------------------------------------------------------------------------------------------------------------------------------------------------------------------------------------------------------------------------------------------------------------------------------------------------------------------------------------------------------------------------------------------------------------------------------------------------------------------------------------------------------------------------------------------------------------------------------------------------------------------------------------------------------------------------------------------------------------------------------------------------------------------------------------------------------------------------------------------------------------------------------------------------------------------------------------------------------------------------------------------------------------------------------------------------------------------------------------|----------------------------------------------------------------------------------------------------------------------------------------------------------------------------------------------------|------------------------------------------------------------------------------------------------|----------------------------------------------------------------------------------------------------------------------------------------------------------------|
| Concept            | PubMed                                                                                                                                                                                                                                                                                                                                                                                                                                                                                                                                                                                                                                                                                                                                                                                                                                                                                                                                                                                                                                                                                                                        | CINAHL                                                                                                                                                                                             | Scopus                                                                                         | MEDLINE(Ovid)                                                                                                                                                  |
| Belief             | <p>“beliefs”[All Fields] OR “culture”[MeSH Terms] OR “culture”[All Fields] OR “belief”[All Fields] OR “beliefs”[All Fields] OR “percept”[All Fields] OR “perceptibility”[All Fields] OR “perceptible”[All Fields] OR “perception”[MeSH Terms] OR “perception”[All Fields] OR “perceptions”[All Fields] OR “perceptual”[All Fields] OR “perceptive”[All Fields] OR “perceptiveness”[All Fields] OR “percepts”[All Fields] OR “view eijing”[Journal] OR “view”[All Fields] OR “attitude”[MeSH Terms] OR “attitude”[All Fields] OR “attitudes”[All Fields] OR “attitude s”[All Fields] OR “knowledge”[MeSH Terms] OR “knowledge”[All Fields] OR “knowledge s”[All Fields] OR “knowledgeability”[All Fields] OR “knowledgeable”[All Fields] OR “knowledgeably”[All Fields] OR “knowledges”[All Fields] OR “myth”[All Fields]</p>                                                                                                                                                                                                                                                                                                  | <p>(MH "Health Beliefs") OR "belief*" OR "*perception" OR "view" OR "attitude*" OR (MH "Attitude") OR (MH "Knowledge") OR "knowledge" OR (MH "Health Knowledge") OR "myth*" OR (MH "Folklore")</p> | <p>TITLE-ABS-KEY ( belief* OR *perception OR knowledge OR view* OR attitude* OR myth* ) )</p>  | <p>belief.mp. or Culture/OR view.mp. OR *perception/ OR attitude*.mp. OR Knowledge/ or Health Knowledge, Attitudes, Practice/ or knowledge.mp.OR myth*.mp.</p> |
| Population         | <p>“gravity”[MeSH Terms] OR “gravity”[All Fields] OR “pregnant”[All Fields] OR “pregnants”[All Fields] OR (“pregnancy”[MeSH Terms] OR “pregnancy”[All Fields] OR “pregnancies”[All Fields] OR “pregnancy s”[All Fields]) OR (“expect”[All Fields] OR “expectable”[All Fields] OR “expectance”[All Fields] OR “expectant”[All Fields] OR “expectative”[All Fields] OR “expected”[All Fields] OR “expecting”[All Fields] OR “expects”[All Fields] OR “motivation”[MeSH Terms] OR “motivation”[All Fields] OR “expectancies”[All Fields] OR “expectancy”[All Fields] OR “expectation”[All Fields] OR “expectations”[All Fields]) AND (“mother s”[All Fields] OR “mothered”[All Fields] OR “mothers”[MeSH Terms] OR “mothers”[All Fields] OR “mother”[All Fields] OR “mothering”[All Fields]) OR (“pregnant women”[MeSH Terms] OR (“pregnant”[All Fields] AND “women”[All Fields]) OR “pregnant women”[All Fields]) OR (“pregnant women”[MeSH Terms] OR (“pregnant”[All Fields] AND “women”[All Fields]) OR “pregnant women”[All Fields] OR (“pregnant”[All Fields] AND “woman”[All Fields]) OR “pregnant woman”[All Fields])</p> | <p>"pregnant*" OR (MH "Expectant Mothers") OR (MH "Pregnancy") OR "pregnancy" OR "pregnant wom#n" OR (MH "Expectant Mothers")</p>                                                                  | <p>TITLE-ABS-KEY ( pregnan* OR "pregnant women" OR "pregnant woman" OR "expect* mother*" )</p> | <p>pregnan*.mp. OR pregnant women.mp. or Pregnant Women/OR pregnant woman.mp. or Pregnant Women/OR expect* mother*.mp.</p>                                     |
| Oral/dental health | <p>“oral health”[MeSH Terms] OR (“oral”[All Fields] AND “health”[All Fields]) OR “oral health”[All Fields] OR (“oral health”[MeSH Terms] OR (“oral”[All Fields] AND “health”[All Fields]) OR “oral health”[All Fields] OR (“dental”[All Fields] AND “health”[All Fields]) OR “dental health”[All Fields]) OR (“mouth”[MeSH Terms] OR “mouth”[All Fields] OR “oral”[All Fields]) AND “care”[All Fields]) OR (“dental care”[MeSH Terms] OR (“dental”[All Fields] AND “care”[All Fields]) OR “dental care”[All Fields])</p>                                                                                                                                                                                                                                                                                                                                                                                                                                                                                                                                                                                                      | <p>(MH "Oral Health") OR "oral health" OR (MH "Dental Health Services") OR "dental health" OR "oral care" OR (MH "Dental Care") OR "dental care"</p>                                               | <p>TITLE-ABS-KEY ( "oral health" OR "dental health" OR "dental care" OR "oral care" )</p>      | <p>Oral Hygiene/ or oral care.mp. OR dental care.mp. or Dental Care/ OR oral health.mp. or Oral Health/ OR dental health.mp.</p>                               |
| Linking concepts   | <p>1 AND 2 AND 3<br/>N=3429</p>                                                                                                                                                                                                                                                                                                                                                                                                                                                                                                                                                                                                                                                                                                                                                                                                                                                                                                                                                                                                                                                                                               | <p>1 AND 2 AND 3<br/>N=195</p>                                                                                                                                                                     | <p>1 AND 2 AND 3<br/>N=622</p>                                                                 | <p>1 AND 2 AND 3<br/>N=430</p>                                                                                                                                 |
