# Supplementary material for: Unfavourable beliefs about oral health and safety of dental care during pregnancy: a systematic review
Source: Springer Nature journal article supplement (doi:10.1186/s12903-023-03439-4), 2023-10-15
Supplement: MOESM3 [file 26182888]

**Figure S1.** Risk of bias assessment for each included study using the CLARITY tool.

| Study                  | Risk of bias |    |    |    |    | Overall |
|------------------------|--------------|----|----|----|----|---------|
|                        | D1           | D2 | D3 | D4 | D5 |         |
| Jago (1984)            | -            | +  | +  | ×  | ×  | ○       |
| Al Habashneh (2005)    | ?            | -  | -  | ×  | ×  | ○       |
| Dinas (2007)           | ?            | +  | +  | ×  | ×  | ○       |
| Saddki (2010)          | +            | +  | +  | +  | -  | ○       |
| Detman (2010)          | ?            | ×  | ?  | ×  | ×  | ○       |
| Bogges (2011)          | ?            | +  | -  | +  | +  | ○       |
| Abiola (2011)          | -            | ?  | -  | +  | -  | ○       |
| Hashim (2012)          | +            | +  | +  | +  | +  | ○       |
| Özen (2012)            | ?            | +  | +  | -  | -  | ○       |
| Murphey (2013)         | -            | ?  | ?  | -  | +  | ○       |
| George (2013)          | -            | -  | -  | ×  | -  | ○       |
| Amin (2014)            | -            | +  | +  | +  | +  | ○       |
| Gupta (2015)           | +            | ?  | +  | +  | +  | ○       |
| Sajjan (2015)          | -            | ?  | +  | +  | +  | ○       |
| Przeklasa (2015)       | ?            | ?  | +  | ×  | ×  | ○       |
| Assery (2016)          | ?            | -  | +  | -  | -  | ○       |
| Nagi (2016)            | -            | ?  | +  | -  | +  | ○       |
| Gaffar (2016)          | -            | +  | +  | +  | +  | ○       |
| Al Khamis (2016)       | -            | -  | ?  | ×  | ×  | ○       |
| Gonik (2017)           | ?            | +  | +  | +  | -  | ○       |
| Abdalla (2017)         | -            | ?  | +  | +  | +  | ○       |
| Abelaziz (2017)        | -            | ?  | +  | +  | +  | ○       |
| Khalaf (2018)          | +            | ?  | +  | -  | -  | ○       |
| Barbieri (2018)        | -            | +  | +  | -  | -  | ○       |
| Abu-Hammad (2018)      | -            | ?  | +  | +  | +  | ○       |
| Bahramian (2018)       | ?            | -  | ?  | ×  | ×  | ○       |
| Ishaq (2018)           | ?            | ?  | +  | ×  | ×  | ○       |
| Lubon (2018)           | -            | ?  | +  | +  | +  | ○       |
| Gupta (2019)           | -            | ?  | +  | ×  | ×  | ○       |
| Hans (2019)            | ?            | ?  | +  | ×  | ×  | ○       |
| Liu (2019)             | ?            | -  | ?  | ×  | ×  | ○       |
| Rafeek (2019)          | -            | ?  | +  | ×  | -  | ○       |
| Barman (2019)          | ?            | ?  | +  | +  | +  | ○       |
| Llena (2019)           | +            | +  | +  | +  | +  | ○       |
| Kamaruddin (2019)      | -            | +  | +  | -  | -  | ○       |
| Awasthi (2020)         | -            | ?  | +  | +  | +  | ○       |
| Soegyanto (2020)       | ?            | ?  | -  | -  | -  | ○       |
| Riaz (2020)            | -            | ?  | -  | -  | -  | ○       |
| Chinenye-Julius (2021) | -            | ?  | +  | -  | -  | ○       |
| Jain (2021)            | ?            | ?  | -  | -  | -  | ○       |
| Azarshahri (2022)      | -            | ?  | +  | -  | -  | ○       |
| Gavic (2022)           | ×            | ?  | +  | -  | +  | ○       |
| Javali (2022)          | +            | +  | +  | ×  | ×  | ○       |
| Kaba (2022)            | +            | +  | +  | ×  | -  | ○       |
| Akbari (2022)          | ?            | ?  | +  | ×  | ×  | ○       |

D1: Representativeness of the source population  
 D2: Adequacy of the response rate  
 D3: Proportion of missing data  
 D4: Comprehensiveness, clarity, and face validity of the survey  
 D5: Reliability and construct validity of the survey

Judgement  
 High (Red X)  
 Unclear (Yellow -)  
 Low (Green +)  
 No information (Blue ?)  
 Not applicable (Grey ○)

Figure generated from <https://mcguinlu.shinyapps.io/robvis/>
