# Supplementary material for: Unfavourable beliefs about oral health and safety of dental care during pregnancy: a systematic review
Source: Springer Nature journal article supplement (doi:10.1186/s12903-023-03439-4), 2023-10-15
Supplement: MOESM4 [file 26182888]

**Table S3.** Original statements and their prevalence in each included study.

| Author (year)                     | Statement (n (%))                                                                                                                                                                                                                                                                                                                                                 | Author (year)                  | Statement (n (%))                                                                                                                                                                                                                                                                                                                                                                                                                                                                                                                               | Author (year)                   | Statement (n (%))                                                                                                                                                                                                                                                                                                                                                                                                                                                                                                                                                                                     |
|-----------------------------------|-------------------------------------------------------------------------------------------------------------------------------------------------------------------------------------------------------------------------------------------------------------------------------------------------------------------------------------------------------------------|--------------------------------|-------------------------------------------------------------------------------------------------------------------------------------------------------------------------------------------------------------------------------------------------------------------------------------------------------------------------------------------------------------------------------------------------------------------------------------------------------------------------------------------------------------------------------------------------|---------------------------------|-------------------------------------------------------------------------------------------------------------------------------------------------------------------------------------------------------------------------------------------------------------------------------------------------------------------------------------------------------------------------------------------------------------------------------------------------------------------------------------------------------------------------------------------------------------------------------------------------------|
| <b>Jago et al. (1984)</b>         | <ul style="list-style-type: none"> <li>- Pregnancy itself causes tooth decay bad (109 (25%))</li> <li>- Pregnancy itself causes gum disease (27 (6%))</li> <li>- A tooth is lost in each pregnancy (35 (8%))</li> </ul>                                                                                                                                           | <b>Assery (2016)</b>           | <ul style="list-style-type: none"> <li>- Pregnancy and lactation cause tooth decay (28 (11%))</li> <li>- Pregnancy leads to tooth decay (125 (50%))</li> <li>- The fetus absorbs calcium from the mother's teeth (93 (37%))</li> <li>- Pregnancy can cause inflammatory gum: (90 (36%))</li> <li>- Dental treatment during pregnancy adversely affects the fetus (128 (51%)): X-rays (127 (50%)), anesthetic injection (77 (31%)), dental fillings (40 (16%)), tooth extraction (15 (6%)), and calculus removal (4 (2%))</li> </ul>             | <b>Liu et al. (2019)</b>        | <ul style="list-style-type: none"> <li>- Dental visits should be avoided during pregnancy</li> <li>- Toothache is normal during pregnancy</li> <li>- The baby absorbs the mother's calcium</li> <li>- Calcium supplements suffice for dental problems prevention</li> <li>- Uncomfortable feeling in teeth is because of "yeet hay" (internal heat)</li> <li>- Pregnant women should avoid taking medicine</li> <li>- Dental check-ups may lead to bleeding and bacterial infection in the baby</li> <li>- The environment, noise, and materials of dental clinics are harmful to the baby</li> </ul> |
| <b>Al Habashneh et al. (2005)</b> | <ul style="list-style-type: none"> <li>- Pregnant women should not visit a dentist during pregnancy - a barrier to dental visits (71 (11%))</li> <li>- A tooth is lost in each pregnancy (116 (19%))</li> <li>- Calcium is absorbed from the mother's teeth by the fetus (294 (47%))</li> </ul>                                                                   | <b>Nagi et al. (2016)</b>      | <ul style="list-style-type: none"> <li>- Certain medications can affect the fetus's growth (146 (33%))</li> <li>- Exposure to radiation during pregnancy is hazardous (149 (33%))</li> <li>- Pregnancy is a cause of teeth loss (112 (25%))</li> </ul>                                                                                                                                                                                                                                                                                          | <b>Rafeek et al. (2019)</b>     | <ul style="list-style-type: none"> <li>- Dental care should be avoided during pregnancy unless it is an emergency (60 (37%))</li> <li>- Dental treatment during pregnancy is not safe - a barrier to dental visits (74 (46%))</li> </ul>                                                                                                                                                                                                                                                                                                                                                              |
| <b>Dinas et al. (2007)</b>        | <ul style="list-style-type: none"> <li>- Dental treatment is not safe during pregnancy</li> <li>- a dental visit barrier (83 (19%))</li> <li>- Dental treatment may have a negative effect on pregnancy outcomes (307 (72%))</li> </ul>                                                                                                                           | <b>Gaffar et al. (2016)</b>    | <ul style="list-style-type: none"> <li>- Dental treatment during pregnancy negatively affects fetal health (53 (27%))</li> <li>- Dental visits cannot be scheduled during pregnancy (91 (46%))</li> </ul>                                                                                                                                                                                                                                                                                                                                       | <b>Barman et al. (2019)</b>     | <ul style="list-style-type: none"> <li>- Dental treatment has negative effects on the fetus - a dental visit barrier (0% of Savar women and 100.0% of Soara women) *</li> </ul>                                                                                                                                                                                                                                                                                                                                                                                                                       |
| <b>Saddki et al. (2010)</b>       | <ul style="list-style-type: none"> <li>- Dental treatment is not safe during pregnancy</li> <li>- a dental visit barrier (14 (16%))</li> </ul>                                                                                                                                                                                                                    | <b>Al Khamis et al. (2016)</b> | <ul style="list-style-type: none"> <li>- It is normal to have dental pain during pregnancy</li> <li>- Pregnant women lose a tooth in each pregnancy</li> <li>- The fetus absorbs the calcium from the mother's teeth</li> <li>- Dental treatment during pregnancy may harm the baby</li> </ul>                                                                                                                                                                                                                                                  | <b>Llena et al. (2019)</b>      | <ul style="list-style-type: none"> <li>- Dental radiography during pregnancy is absolutely contraindicated (123 (88%))</li> <li>- Dental anesthesia is contraindicated during pregnancy (116 (83%))</li> </ul>                                                                                                                                                                                                                                                                                                                                                                                        |
| <b>Detman et al. (2010)</b>       | <ul style="list-style-type: none"> <li>- Pain medication is not prescribed for pregnant women</li> <li>- Dental anesthetics are not used for pregnant women</li> <li>- Dentists do not provide treatment for pregnant women</li> <li>- Teeth should not be extracted during pregnancy</li> <li>- The fetus absorbs the calcium from the mother's teeth</li> </ul> | <b>Gonik et al. (2017)</b>     | <ul style="list-style-type: none"> <li>- Tooth decay is normal during pregnancy (urban: 37 (18%), suburban: 11 (20%))</li> <li>- Tooth loss is normal during pregnancy (urban: 17 (8%), suburban: 5 (9%))</li> <li>- Bleeding gum is normal during pregnancy (urban: 94 (45%), suburban: 31 (57%))</li> <li>- Swollen gum is normal during pregnancy (urban: 37 (18%), suburban: 27 (50%))</li> <li>- Toothache is normal during pregnancy (urban: 62 (30%), suburban: 5 (9%))</li> <li>- Frequency (%) of oral and dental practices</li> </ul> | <b>Kamaruddin et al. (2019)</b> | <ul style="list-style-type: none"> <li>- Dental treatment during pregnancy is not safe - a dental visit barrier (20 (26%))</li> <li>- Pregnant women should avoid dental treatment unless it is an emergency (44 (58%))</li> </ul>                                                                                                                                                                                                                                                                                                                                                                    |

|                             |                                                                                                                                                                                                                                  |                                 |                                                                                                                                                                                                                                                                                                                                                                                                               |                                      |                                                                                                                                                                                                                                                                                                          |
|-----------------------------|----------------------------------------------------------------------------------------------------------------------------------------------------------------------------------------------------------------------------------|---------------------------------|---------------------------------------------------------------------------------------------------------------------------------------------------------------------------------------------------------------------------------------------------------------------------------------------------------------------------------------------------------------------------------------------------------------|--------------------------------------|----------------------------------------------------------------------------------------------------------------------------------------------------------------------------------------------------------------------------------------------------------------------------------------------------------|
|                             |                                                                                                                                                                                                                                  |                                 | which were considered safe in urban and suburban centres: tooth cleaning (164 (79%), 49 (91%)), tooth x-ray (21 (10%), 11 (20%)), filling cavities (35 (17%), 25 (46%)), fluoride treatment (19 (9%), 11 (20%)), local anesthesia (10 (5%), 9 (17%)), Antibiotic prescription (33 (16%), 14 (26%)), Pain medication prescription (29 (14%), 6 (11%)).                                                         |                                      |                                                                                                                                                                                                                                                                                                          |
| <b>Bogges et al. (2011)</b> | - It is not safe for pregnant women to get routine dental care such as checkups and cleanings (76 (13%))<br>- A woman can lose a tooth just because she is pregnant (112 (19%))                                                  | <b>Abdalla et al. (2017)</b>    | - Pregnancy causes tooth loss (227 (76%))<br>- Pregnancy causes calcium loss (261 (87%))                                                                                                                                                                                                                                                                                                                      | <b>Awasthi et al. (2020)</b>         | - Pregnancy is one of the causes of gum problems (28 (25%))<br>- It is not necessary to visit a dentist during pregnancy (41 (36%))<br>- Pregnancy causes tooth loss (0 (0%))                                                                                                                            |
| <b>Abiola et al. (2011)</b> | - Pregnancy is a cause of gum problems (67 (15%))<br>- Dental visits are unnecessary during pregnancy (106 (23%))                                                                                                                | <b>Abelaziz et al. (2017)</b>   | - Changes that occur to the mouth and teeth during pregnancy are normal (248 (93%))<br>- If one is not exposed to oral/dental problems during pregnancy, they do not need dental checkups (80 (30%))<br>- Providing medical procedures to treat oral/dental problems during pregnancy can affect your baby (112 (42%))<br>- Treatment of oral/dental problems should be delayed til after delivery (63 (24%)) | <b>Soegyanto et al. (2020)</b>       | - Dentists cannot provide any dental treatment during pregnancy - a barrier to dental visit (3 (2%))<br>- A tooth is lost in each pregnancy (12 (7%))<br>- Calcium is absorbed from the mother's teeth by the fetus (68 (41%))                                                                           |
| <b>Hashim (2012)</b>        | - A tooth is lost in each pregnancy (333 (44%))                                                                                                                                                                                  | <b>Khalaf et al. (2018)</b>     | - The fetus is responsible for tooth loss during pregnancy as they absorb calcium from their mothers (277 (76%))<br>- It is possible to lose teeth because of pregnancy (298 (82%))<br>- It is unsafe for the pregnant women to visit the dentist even for regular checkups (232 (64%))                                                                                                                       | <b>Riaz et al. (2020)</b>            | - Pregnant women should seek dental treatment only in case of emergency (192 (74 %))                                                                                                                                                                                                                     |
| <b>Özen et al. (2012)</b>   | - Dentists cannot provide any dental treatment during pregnancy - a dental visit barrier (34 (10%))<br>- A tooth is lost in each pregnancy (151 (43%))<br>- Calcium is absorbed from the mother's teeth by the fetus (256 (73%)) | <b>Barbieri et al. (2018)</b>   | - The increase in dental caries occurrences is due to weakening of teeth by loss of calcium (57 (29%))<br>- The increase in dental caries occurrences is due to hormonal changes (37 (19%))<br>- Dental treatment should be avoided during the entire pregnancy (18 (9%))<br>- Dental treatment should only be in case of emergency (19 (10%))                                                                | <b>Chinenye-Julius et al. (2021)</b> | - Visit a dentist is harmful to the fetus (137 (36%))<br>- Pregnant women do not need to visit dental clinics (157 (41%))                                                                                                                                                                                |
| <b>Murphey (2013)</b>       | - The mother's diet during pregnancy affects the child's teeth color<br>- Routine dental procedures would predispose mothers to premature birth or harm the unborn baby<br>- Dental radiographs harm the baby                    | <b>Abu-Hammad et al. (2018)</b> | - Dental radiography is not safe during pregnancy (36 (10%))<br>- Pregnant women can lose teeth only because of pregnancy (201 (55%))<br>- Visiting a dentist during pregnancy for check-up and scaling is not safe (218 (61%))                                                                                                                                                                               | <b>Jain et al. (2021)</b>            | - One should not brush during pregnancy (32 (8%))<br>- One should wait for a few days to few weeks before starting brushing after delivery (241 (63%))<br>- One should avoid going to the dentist during pregnancy even in case of toothache (56 (15%))<br>- Gum bleeding during pregnancy is common and |

|                             |                                                                                                                                                                                                                                                                                                                                                                                                                    |                                |                                                                                                                                                                                                                                                                                                                                                                                                                                                           |                                 |                                                                                                                                                                                                                                                                                                                                                                                                                                                                        |
|-----------------------------|--------------------------------------------------------------------------------------------------------------------------------------------------------------------------------------------------------------------------------------------------------------------------------------------------------------------------------------------------------------------------------------------------------------------|--------------------------------|-----------------------------------------------------------------------------------------------------------------------------------------------------------------------------------------------------------------------------------------------------------------------------------------------------------------------------------------------------------------------------------------------------------------------------------------------------------|---------------------------------|------------------------------------------------------------------------------------------------------------------------------------------------------------------------------------------------------------------------------------------------------------------------------------------------------------------------------------------------------------------------------------------------------------------------------------------------------------------------|
|                             | <ul style="list-style-type: none"> <li>- Noises made by dental equipment frighten or harm the baby</li> <li>- Calcium is absorbed from the mother's teeth during pregnancy which can be compensated through swishing and keeping the milk in the mouth before swallowing</li> </ul>                                                                                                                                |                                |                                                                                                                                                                                                                                                                                                                                                                                                                                                           |                                 | <ul style="list-style-type: none"> <li>needs no special attention (65 (17%))</li> <li>- Oral health during pregnancy has nothing to do with the baby's health (21 (6%))</li> <li>- Injection for numbness for dental treatment during pregnancy affects the development of the baby's organs (93 (24%))</li> <li>- Dental extraction during pregnancy causes miscarriage (83 (22%))</li> </ul>                                                                         |
| <b>George et al. (2013)</b> | <ul style="list-style-type: none"> <li>- Dental treatment is not safe during pregnancy</li> <li>- a dental visit barrier (77 (32%))</li> <li>- Dental treatment should be avoided during pregnancy unless it is an emergency (63 (26%))</li> </ul>                                                                                                                                                                 | <b>Bahramian et al. (2018)</b> | <ul style="list-style-type: none"> <li>- One does not need to visit a dentist during pregnancy if they take calcium supplements</li> <li>- At least one tooth is destructed in each pregnancy</li> <li>- Calcium from the mother's teeth is consumed for formation of fetus skeleton</li> <li>- Medication prescribed by dentists may harm the fetus</li> <li>- Radiography causes miscarriage</li> <li>- Dental anesthetics cause miscarriage</li> </ul> | <b>Azarshahri et al. (2022)</b> | <ul style="list-style-type: none"> <li>- It is normal to lose a tooth during pregnancy (346 (56%))</li> <li>- Calcium is absorbed from pregnant women's teeth by the fetus (168 (27%))</li> <li>- Dental treatment could harm unborn child - reasons for not using dental services (15 (6%))</li> <li>- Poor oral health is normal during pregnancy - reasons for not using dental services (1 (&lt;1%))</li> </ul>                                                    |
| <b>Amin et al. (2014)</b>   | <ul style="list-style-type: none"> <li>- It is normal to lose a tooth during pregnancy (60 (14%))</li> <li>- Calcium is absorbed from a pregnant woman's teeth by the fetus (248 (59%))</li> <li>- Dental treatment could harm unborn child - reasons for not using dental services (33 (15%))</li> <li>- Poor oral health is normal during pregnancy - reasons for not using dental services (4 (2%))</li> </ul>  | <b>Ishaq et al. (2018)</b>     | <ul style="list-style-type: none"> <li>- Dental treatments are not safe during pregnancy (94 (78%))</li> <li>- Dental extraction cannot be done during pregnancy (101 (83%))</li> <li>- X-rays are not safe during pregnancy (105 (87%))</li> </ul>                                                                                                                                                                                                       | <b>Gavic et al. (2022)</b>      | <ul style="list-style-type: none"> <li>- Local anesthesia is not safe for pregnant women (145 (45%))</li> <li>- Attitudes about safety of treatments during pregnancy: Routine teeth cleaning (320 (98%)), production of fillings or crowns (72 (21%)), periodontal treatment (99 (30%)), extractions (31 (10%)), intraoral/extraoral radiograms (5 (2%))</li> </ul>                                                                                                   |
| <b>Gupta et al. (2015)</b>  | <ul style="list-style-type: none"> <li>- Pain in gums or bleeding gums is normal during pregnancy (13 (7%))</li> <li>- Visiting a dentist during pregnancy is not safe (46 (23%))</li> <li>- Pregnancy is a cause of loosening teeth (34 (17%))</li> <li>- After delivery teeth shouldn't be brushed (82 (41%))</li> <li>- Treatment of dental related problems during pregnancy is not safe (84 (42%))</li> </ul> | <b>Lubon et al. (2018)</b>     | <ul style="list-style-type: none"> <li>- Poor oral hygiene causes cavities that enter the abdomen and negatively affect the baby</li> </ul>                                                                                                                                                                                                                                                                                                               | <b>Javali et al. (2022)</b>     | <ul style="list-style-type: none"> <li>- X-rays affect mother and baby (412 (93%))</li> <li>- Medications affect mother and baby (431 (97%))</li> <li>- Pregnant need dental checkups (432 (97%))</li> </ul>                                                                                                                                                                                                                                                           |
| <b>Sajjan et al. (2015)</b> | <ul style="list-style-type: none"> <li>- Exposure to radiation is hazardous to the baby (106 (32%))</li> <li>- Certain medications affect the development of the child (133 (40%))</li> </ul>                                                                                                                                                                                                                      | <b>Gupta et al. (2019)</b>     | <ul style="list-style-type: none"> <li>- Dental treatment during pregnancy is not safe - a dental visit barrier (8 (16%))</li> </ul>                                                                                                                                                                                                                                                                                                                      | <b>Kaba et al. (2022)</b>       | <ul style="list-style-type: none"> <li>- Pregnant women should not visit a dentist for dental treatments (173 (56%))</li> <li>- Dental treatment during pregnancy is harmful to the baby (159 (52%))</li> <li>- Pregnancy causes tooth loss (264 (86%))</li> <li>- It is normal to have bleeding gums during pregnancy (264 (86%))</li> <li>- Scaling during pregnancy is not safe (165 (54%))</li> <li>- Pregnant women cannot have dental extraction (264</li> </ul> |

|                                |                                                                                                                                                                                                 |                           |                                                                                                                                                                                                                                                                                            |                                                                                                                                                                                                                                                                                                                                                                                                                                                                                                                                                                                                                                                                                                                                                     |
|--------------------------------|-------------------------------------------------------------------------------------------------------------------------------------------------------------------------------------------------|---------------------------|--------------------------------------------------------------------------------------------------------------------------------------------------------------------------------------------------------------------------------------------------------------------------------------------|-----------------------------------------------------------------------------------------------------------------------------------------------------------------------------------------------------------------------------------------------------------------------------------------------------------------------------------------------------------------------------------------------------------------------------------------------------------------------------------------------------------------------------------------------------------------------------------------------------------------------------------------------------------------------------------------------------------------------------------------------------|
|                                |                                                                                                                                                                                                 |                           |                                                                                                                                                                                                                                                                                            | (86%)<br>- Dental X-ray during pregnancy is harmful to the baby (227 (74%))<br>- Pregnant women can lose a tooth only because of pregnancy (289 (94%))<br>- Visiting the dentist during pregnancy for a check-up is not safe (63 (21%))                                                                                                                                                                                                                                                                                                                                                                                                                                                                                                             |
| <b>Przeklasa et al. (2015)</b> | - Dental anesthetics cannot be administered during pregnancy (60 (45%))<br>- Teeth may not be treated during pregnancy (11 (8%))<br>- Dental visit is not necessary during pregnancy (25 (19%)) | <b>Hans et al. (2019)</b> | - Pain in gums and bleeding are normal during pregnancy (144 (64%))<br>- Pregnant females should avoid dental treatment unless it is an emergency (202 (90%))<br>- Pregnancy causes loosening of the teeth (181 (80%))<br>- It is not safe to visit a dentist during pregnancy (156 (69%)) | <b>Akbari et al. (2022)</b><br>- Pregnant women's teeth decay easily due to calcium absorption by the fetus (562 (70%))<br>- Calcium supplement consumption during pregnancy stimulates the eruption of primary teeth (547 (68%))<br>- Receiving an anesthetic injection for dental treatment during pregnancy affects the fetus's organs (398 (50%))<br>- Tooth extraction during pregnancy causes miscarriage (230 (29%))<br>- Bleeding gums during pregnancy is common and does not need any specific treatment (229 (29%))<br>- A pregnant woman should not visit a dentist during her pregnancy regardless of having any oral problems (51 (6%))<br>- A woman should delay brushing her teeth for a few days or weeks after delivery (22 (3%)) |

\* The exact number of pregnant women in each tribe is not provided by the authors.
